# Supplementary material for: Deep eutectic solvent engineering: a novel ternary system for efficient lignocellulose extraction
Source: Royal Society of Chemistry journal article supplement (doi:10.1039/d4gc05138f), 2025-01-01
Supplement: d4gc05138f1.pdf [file d4gc05138f1.pdf]

Supporting information for

**Deep Eutectic Solvent Engineering: A Novel Ternary System for  
Efficient Lignocellulose Extraction**

Guanzheng Wu<sup>1</sup>, Yu Cheng<sup>1</sup>, Caoxing Huang<sup>2</sup>, Cheng Yong<sup>3\*</sup>, Yu Fu<sup>1\*</sup>

<sup>1</sup>Co-Innovation Center of Efficient Processing and Utilization of Forest Resource

School of Materials Science and Engineering,

Nanjing Forestry University, Nanjing, Jiangsu, 210037, China

<sup>2</sup>Co-Innovation Center of Efficient Processing and Utilization of Forest Resources,

Nanjing Forestry University, Nanjing 210037, China

<sup>3</sup>Institute of Agricultural Resources and Environment ,

Jiangsu Academy of Agricultural Sciences/Jiangsu Collaborative Innovation Center fo

r Solid Organic Waste Resource Utilization, Nanjing 210014, China

\*E-mail: [fuyu@wsu.edu](mailto:fuyu@wsu.edu)

**Table S1 The details of different DESs and treatment conditions.**

| Biomass     | DESs |                                     |             |          | Treatment Conditions |          | Treatment effect                |
|-------------|------|-------------------------------------|-------------|----------|----------------------|----------|---------------------------------|
|             | Name | HBA:HBD                             | Molar ratio | PEG (ml) | Temperature (°C)     | Time (h) |                                 |
| Wheat straw | D    |                                     |             | /        |                      |          | ☐Satisfactory ☐General<br>☐Poor |
|             | D-5  | K <sub>2</sub> CO <sub>3</sub> :Gly | 1:5         | 5        | 160                  | 24       | ☐Satisfactory ☐General<br>☐Poor |
|             | D-10 |                                     |             | 10       |                      |          | ☐Satisfactory ☐General<br>☐Poor |
|             | D-20 |                                     |             | 20       |                      |          | ☐Satisfactory ☐General<br>☐Poor |

Note: Alkaline DESs (PH value:12.5-13)

**Table S2 Parameters of Arrhenius equation fitting curves.**

| Name | Parameters             |                                  | R <sup>2</sup> |
|------|------------------------|----------------------------------|----------------|
|      | $\eta_1$               | $E_\eta$ (kJ·mol <sup>-1</sup> ) |                |
| D    | $1.71 \times 10^{-11}$ | 72.21                            | 0.99           |
| D-5  | $8.40 \times 10^{-11}$ | 65.63                            | 0.99           |
| D-10 | $2.93 \times 10^{-10}$ | 60.16                            | 0.99           |
| D-20 | $2.62 \times 10^{-9}$  | 51.54                            | 0.99           |

Note:  $E_\eta$  is the viscous flow activation energy, which is not only the energy needed to overcome the action of the surrounding molecules when the macromolecule transitions to the hole, but also a measure of the melt viscosity-temperature sensitivity. That is, the larger the  $E_\eta$ , the fluidity is also worse, and the viscosity-temperature change is more sensitive.

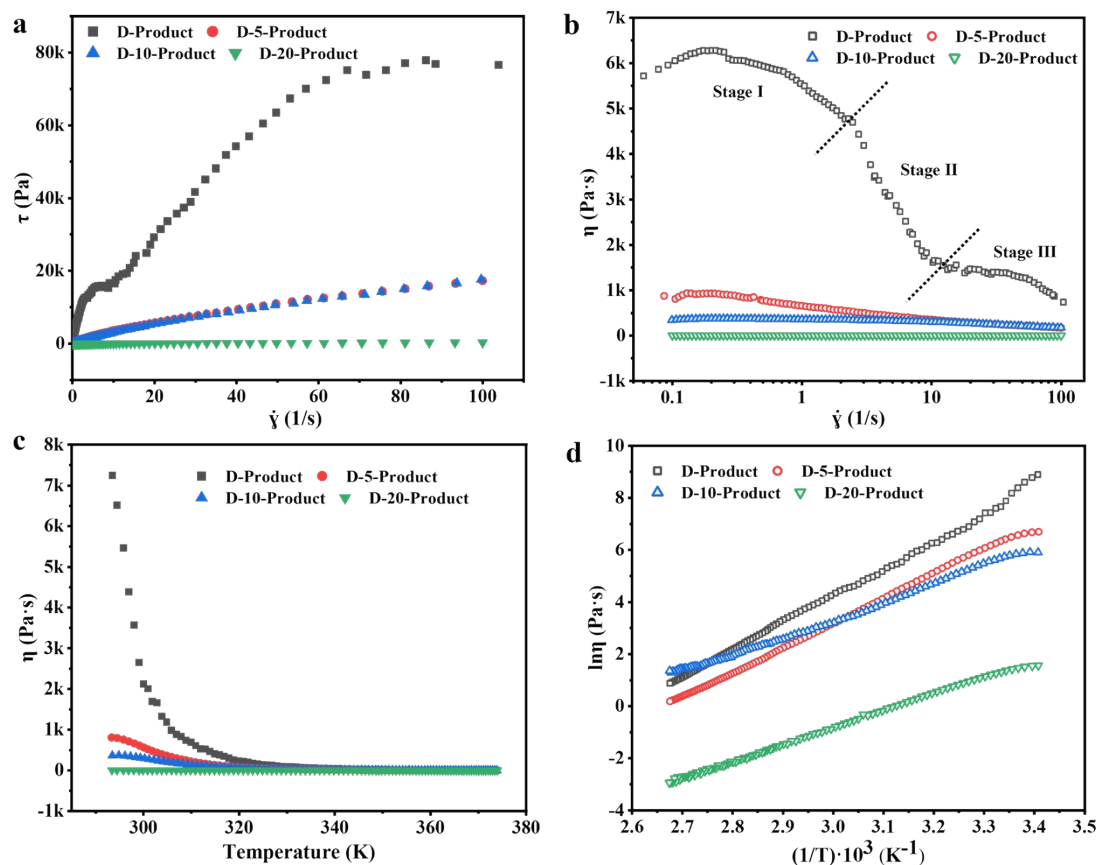

**Fig. S1 Rheological properties test of D-product, D-5-product, D-10-product and D-20-product: (a) Rheological curve (shear stress-shear rate); (b) Viscosity-shear rate dependence curve; (c) Viscosity-temperature dependence curve; (d) Viscosity-temperature sensitivity fitting curve.**

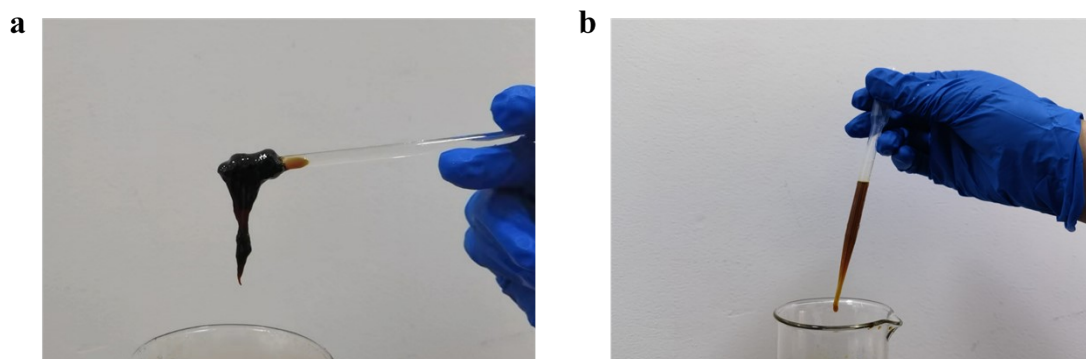

**Fig. S2 Fluidity of (a) D-product and (b) D-10-product.**

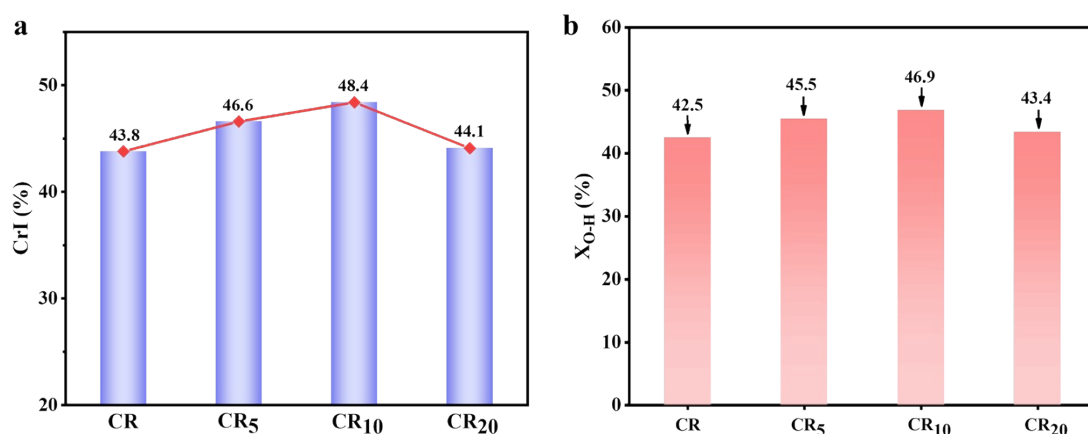

**Fig. S3 Calculation results of CR, CR<sub>5</sub>, CR<sub>10</sub> and CR<sub>20</sub>: (a) CrI values; (b) X<sub>O-H</sub> values.**

For potassium carbonate, the main functional group is the vibration absorption peak of carbonate ion. The peaks at 1456 and 1377 cm<sup>-1</sup> correspond to the out-of-plane asymmetric stretching vibration of CO<sub>3</sub><sup>2-</sup>. The peaks at 879 and 707 cm<sup>-1</sup> correspond to the out-of-plane asymmetric and in-plane symmetric bending vibration of CO<sub>3</sub><sup>2-</sup>, respectively.<sup>1</sup> For glycerol, the peak at 3288 cm<sup>-1</sup> corresponds to the stretching vibration of O-H. The peaks at 2929 and 2875 cm<sup>-1</sup> correspond to the asymmetric and symmetric stretching vibrations of -CH<sub>2</sub>, respectively. After forming a binary DES system with K<sub>2</sub>CO<sub>3</sub>, the absorption frequency of the O-H stretching vibration shifts to the low wave number direction and the peak shape is broadened. This indicates the formation of intermolecular associative hydrogen bonding, where the oxygen atom of the CO<sub>3</sub><sup>2-</sup> attracts the hydrogen proton in glycerol.<sup>2</sup> The same phenomenon can also be observed in the ternary system formed by introducing PEG-200. In addition, the relative intensity of the asymmetric stretching vibrational peak of -CH<sub>2</sub> is weakened, while the relative intensity of the symmetric stretching vibrational peak is enhanced. This may also be attributed to the presence of hydrogen bonding, which in turn affects the stretching vibration of -CH<sub>2</sub>.

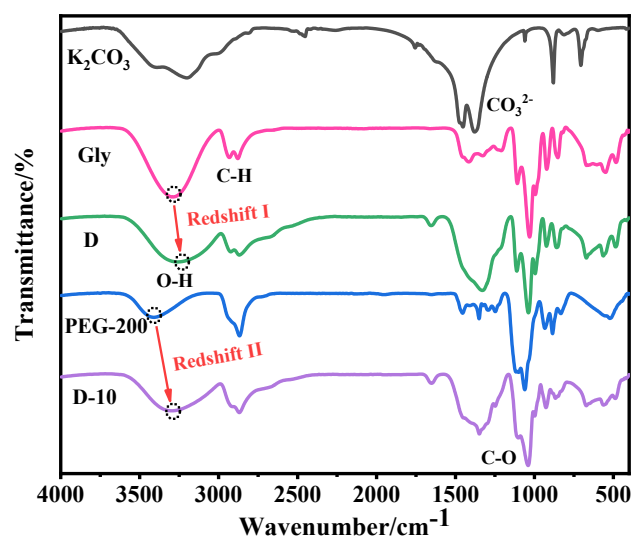

Fig.S4 FT-IR spectrum of individual components and different DESs.

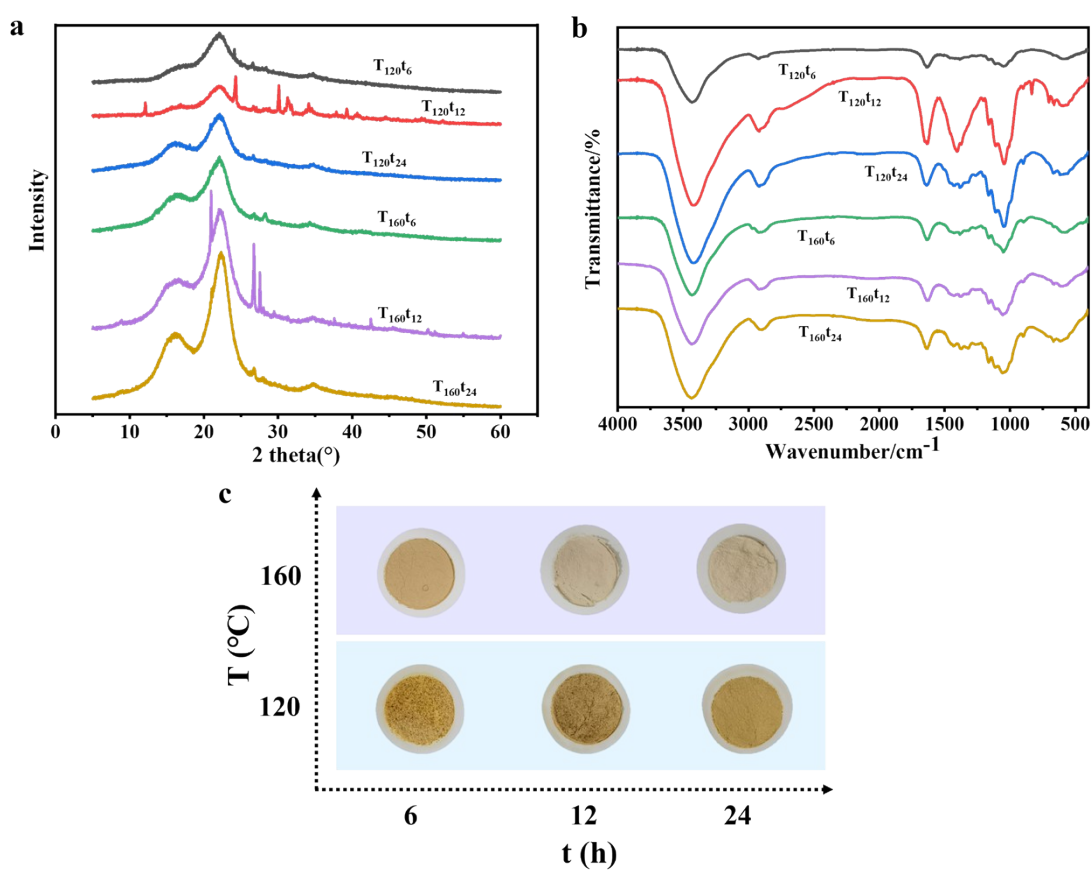

Fig. S5 Comparing tests: (a) XRD characterization; (b) FT-IR characterization; (c) Treatment effects of D-10 at different reaction temperatures and times.

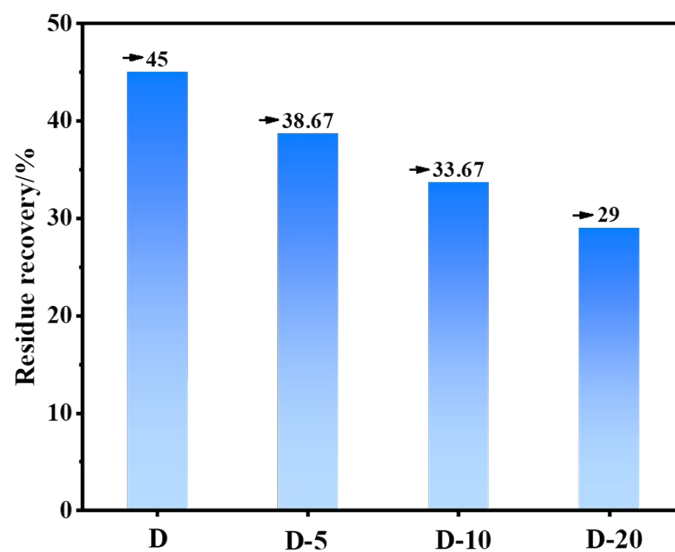

Fig. S6 Residue recovery of D, D-5, D-10 and D-20.

Table S3 Performances of traditional and our designed ternary DESs treatment on LCB.

| Biomass                              | DESs                                        | Treatment Conditions |          |                                      | Removal (%) |        | Residue recovery (%) | Cellulose yield (%) | References |
|--------------------------------------|---------------------------------------------|----------------------|----------|--------------------------------------|-------------|--------|----------------------|---------------------|------------|
|                                      | (HBA/HBD)                                   | Temperature (°C)     | Time (h) | Other                                | Xylan       | Lignin |                      |                     |            |
| Wheat straw                          | K <sub>2</sub> CO <sub>3</sub> /Gly/PEG-200 | 160                  | 24       | /                                    | 81.93       | 96.37  | 33.67                | 73.65               | This work  |
| Wheat straw                          | ChCl/LC                                     | 120                  | 6        | /                                    | /           | 60.1   | /                    | 64.9                | 34         |
| Wheat straw                          | ChCl/LC                                     | 100                  | 16       | /                                    | /           | /      | 44.9                 | /                   | 19         |
| Corn stalk                           | ChCl/LC                                     | 100                  | 16       | /                                    | /           | /      | 32.2                 | /                   | 19         |
| Corn stover                          | ChCl/OA/EG                                  | 130                  | 1        | High pressure                        | /           | 75.27  | /                    | /                   | 20         |
| Bamboo                               | ChCl/Xylitol                                | 120                  | 3        | 1 wt% H <sub>2</sub> SO <sub>4</sub> | 92.79       | 80.75  | 41.5                 | /                   | 22         |
| Bamboo                               | ChCl/LC                                     | 120                  | 3        | Dewaxing                             | 74.81       | 94.39  | 49.18                | 91.06               | 24         |
| <i>Eucommia ulmoides</i> seed shells | ChCl/OA/EG                                  | 100                  | 3        | /                                    | 79.7        | 65.6   | /                    | 84.0                | 37         |

1 Hosein. Ghaedi, Payam. Kalhor, M. Zhao, *Frontiers of Environmental Science & Engineering*, 2022, 16, 7, 92.

2 P. C. Meng, J. Li, W. Liu, G. L. Yang, *LWT - Food Science and Technology*, 2023, 186, 115232.
